# Supplementary material
Source: PubMed Central journal article supplement (PMC6814383)
Supplement: NIHMS1539393-supplement-007213_-_Supplemental_Material.pdf [file NIHMS1539393-supplement-007213_-_Supplemental_Material.pdf]

## SUPPLEMENTAL MATERIAL

**Supplementary Table 1:** Distribution of mutation types by their location in the LQT1, LQT2 and LQT3 genes and their relationship to AF.

|                                            | AF    | No AF   | p-value |
|--------------------------------------------|-------|---------|---------|
| <b>LQT1: Transmembrane mutations, n(%)</b> | 6(38) | 404(53) | 0.231   |
| <b>LQT2: Pore mutations, n(%)</b>          | 0(0)  | 170(23) | 1.000   |
| <b>LQT3: Pore mutations, n(%)</b>          | 6(35) | 40(19)  | 0.113   |

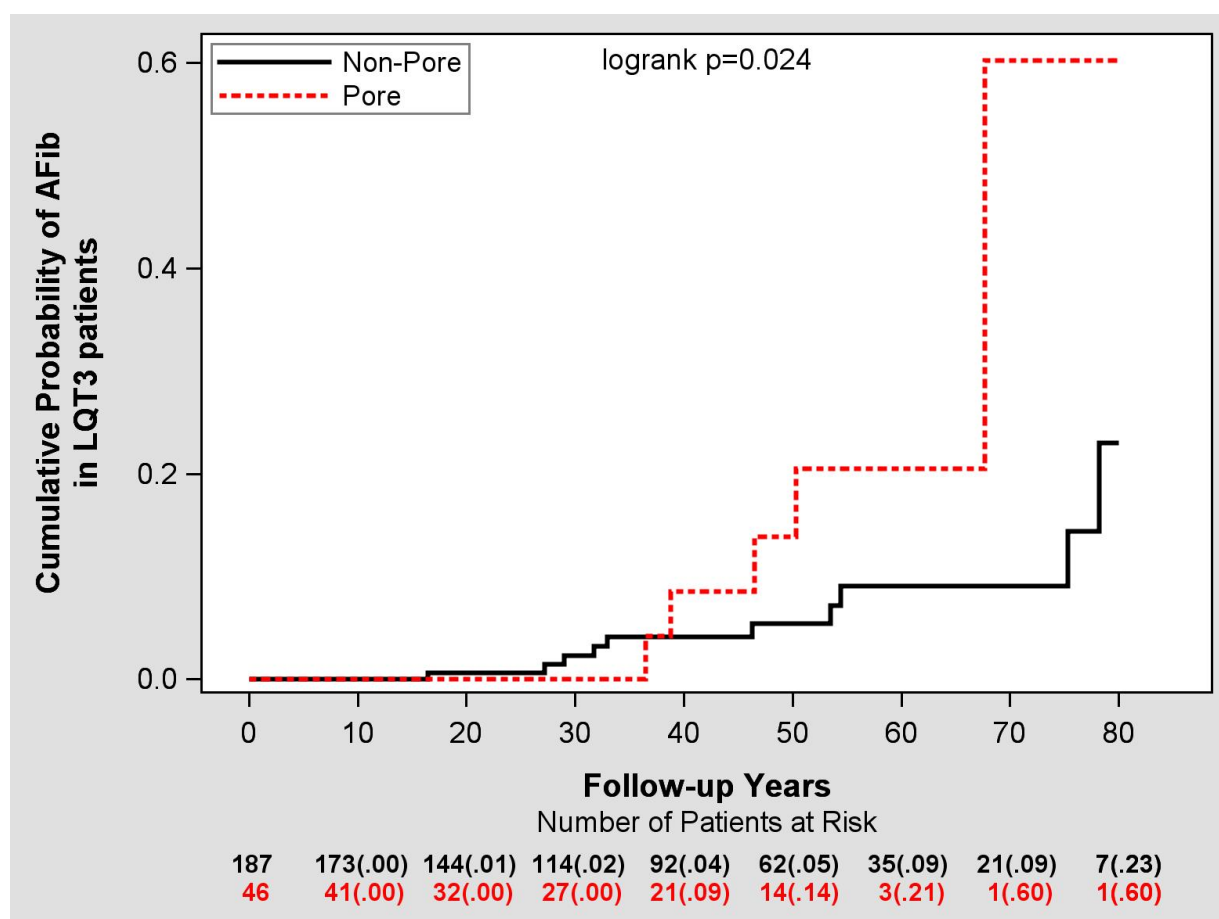

**Supplementary Figure 1A:** Cumulative life-time risk of new onset AF among LQT3 patients by the type of SCN5A mutations (pore vs non-pore). Note the increased AF hazard associated with the pore mutations.

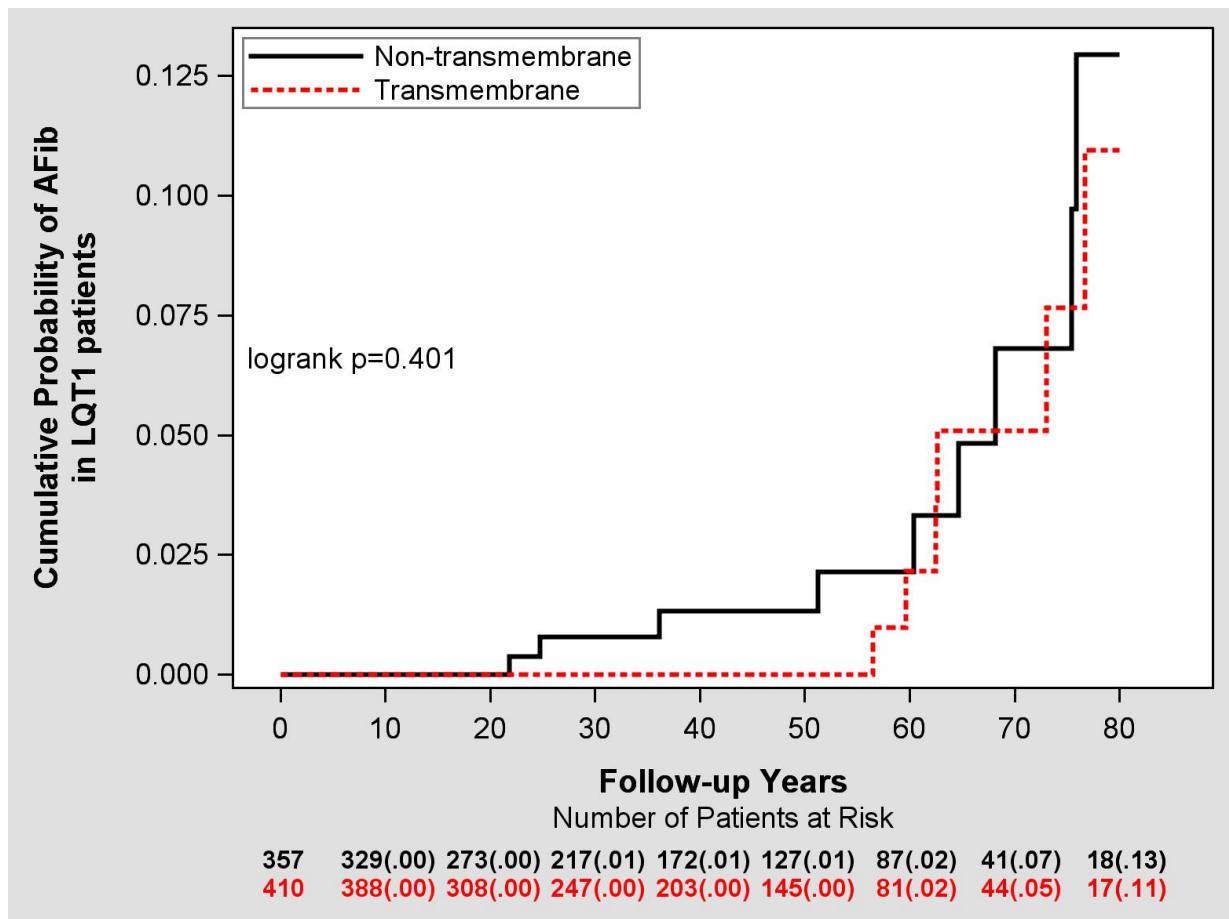

**Supplementary Figure 1B:** Cumulative life-time risk of new-onset AF among LQT1 patients by the type of KCNQ1 mutation (transmembrane vs non-transmembrane)

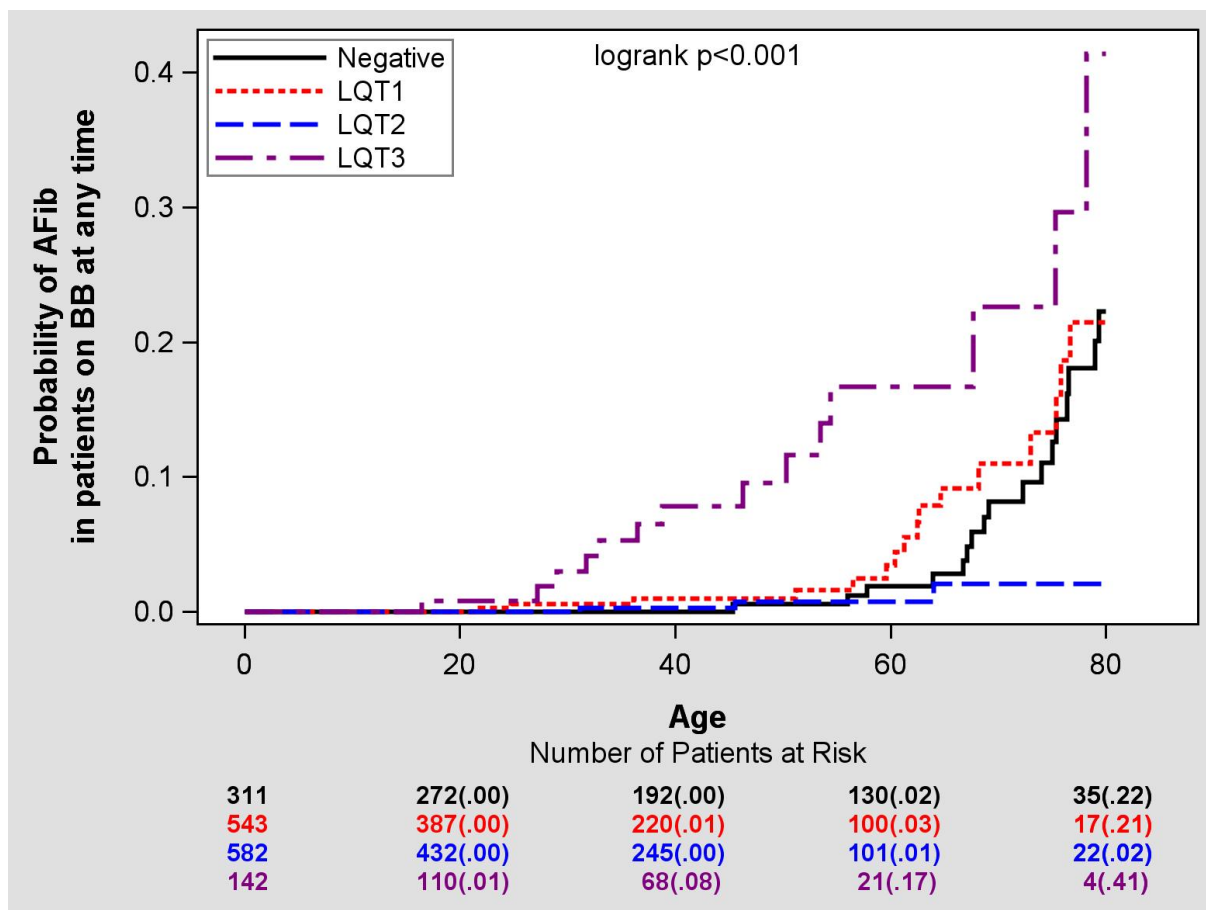

**Supplementary Figure 2:** The results of sensitivity analysis demonstrating cumulative lifetime risk of AF among patients with LQTS by genotype compared with genotype-negative controls. The analysis is limited to patients who were treated with beta-blockers at any time. Observe that curve distribution is similar to the entire cohort presented in the Figure 1 thus suggesting that differences in the AF risk between genotypes are not dependent on the beta-blocker use.
